# Supplementary material for: PCA of Running Biomechanics after 5 km between Novice and Experienced Runners
Source: MDPI journal article supplement (doi:10.3390/bioengineering10070876), 2023-07-24
Supplement: s1 [file s1]

**Table S1.** Effect sizes and 95% confidence intervals for comparison of joint range of motion (ROM) and moment.

| Variable     |                   | Novice pre vs. post |             | Experienced pre vs. post |             | Novice pre vs. Experienced pre |             | Novice post vs Experienced post |             |
|--------------|-------------------|---------------------|-------------|--------------------------|-------------|--------------------------------|-------------|---------------------------------|-------------|
|              |                   | Cohen's d           | 95% CI      | Cohen's d                | 95% CI      | Cohen's d                      | 95% CI      | Cohen's d                       | 95% CI      |
| Joint ROM    |                   |                     |             |                          |             |                                |             |                                 |             |
| Ankle        | Dorsi/Plant       | 0.35                | 40.53–45.98 | 0.12                     | 43.05–46.91 | 0.03                           | 43.03–46.32 | 0.51                            | 41.94–45.19 |
|              | Invert/Evert      | 0.01                | 15.78–18.60 | 0.29                     | 15.23–16.14 | 0.46                           | 15.23–17.26 | 0.32                            | 15.99–17.26 |
|              | Int Rot/Ext Rot   | 0.31                | 14.01–15.13 | 0.11                     | 13.19–14.65 | 0.43                           | 13.78–14.93 | 0.06                            | 13.66–14.61 |
| Knee         | Ext/Flex          | 0.26                | 25.81–27.51 | 0.71                     | 30.26–31.87 | 1.59                           | 28.33–30.08 | 0.89                            | 27.87–29.17 |
|              | Adduct/Abduct     | 0.89                | 3.10–3.65   | 0.05                     | 3.14–3.67   | 0.74                           | 2.97–3.26   | 0.34                            | 3.36–3.97   |
|              | Int Rot/Ext Rot   | 0.04                | 7.18–8.14   | 0                        | 7.08–8.38   | 0.45                           | 6.73–7.62   | 0.47                            | 7.70–8.72   |
| Hip          | Flex/Ext          | 0.12                | 42.21–43.77 | 0.24                     | 41.28–43.82 | 0.34                           | 41.79–43.37 | 0.07                            | 41.84–44.08 |
|              | Adduct/Abduct     | 0.16                | 13.27–15.59 | 1.02                     | 10.84–11.53 | 1.28                           | 11.67–12.80 | 0.81                            | 12.72–14.04 |
|              | Int Rot/Ext Rot   | 0.31                | 10.29–13.33 | 0.07                     | 9.76–11.41  | 0.12                           | 10.12–11.32 | 0.41                            | 10.84–12.51 |
| Joint Moment |                   |                     |             |                          |             |                                |             |                                 |             |
| Ankle        | Plantarflexion    | 0.63                | 2.21–2.45   | 0.73                     | 2.35–2.48   | 0.11                           | 2.39–2.57   | 0.44                            | 2.21–2.33   |
|              | Inversion         | 0.12                | 0.93–1.01   | 0.77                     | 0.59–0.71   | 1.56                           | 0.71–0.81   | 1.13                            | 0.81–0.90   |
|              | Internal rotation | 0                   | 0.13–0.19   | 0.43                     | 0.09–0.13   | 0.87                           | 0.11–0.15   | 0.46                            | 0.12–0.16   |
| Knee         | Extension         | 0.50                | 3.55–3.74   | 0                        | 3.66–3.40   | 0.07                           | 3.47–3.61   | 0.49                            | 3.57–3.69   |
|              | Abduction         | 0.31                | 0.65–0.76   | 0.84                     | 0.61–0.67   | 0.16                           | 0.65–0.72   | 0.84                            | 0.62–0.70   |
|              | Internal rotation | 0.18                | 0.50–0.56   | 0.59                     | 0.50–0.55   | 0.21                           | 0.53–0.57   | 0.17                            | 0.48–0.53   |
| Hip          | Extension         | 0.62                | 1.10–1.24   | 0.05                     | 1.28–1.48   | 0.86                           | 1.15–1.30   | 0.40                            | 1.27–1.38   |
|              | Abduction         | 0.18                | 1.92–2.11   | 0.08                     | 1.71–1.85   | 0.73                           | 1.81–1.93   | 0.74                            | 1.84–2.00   |
|              | External rotation | 0.04                | 0.76–0.89   | 0.40                     | 0.79–0.88   | 0.21                           | 0.80–0.90   | 0.08                            | 0.76–0.86   |

Note: CI = confidence interval.

**Table S2.** Mean (SD) of joint angles for all principal components (PCs) retained according to the 90% trace criterion.

| Joint           | Angle           | PC       | Variance Explained (%) | Mean (SD) PC scores |               |                 |                  | Runner p-Value | 5 km p-Value | Interaction p-Value |
|-----------------|-----------------|----------|------------------------|---------------------|---------------|-----------------|------------------|----------------|--------------|---------------------|
|                 |                 |          |                        | Novice/Pre          | Novice/Post   | Experienced/Pre | Experienced/Post | Main Effect    | Main Effect  | Effect              |
| Ankle           | Dorsi/Plant     | 1        | 47.67                  | 0.77 (9.57)         | -0.68 (7.34)  | -0.88 (3.05)    | 0.79 (6.21)      | 0.950          | 0.868        | 0.012               |
|                 |                 | 2        | 32.94                  | -1.23 (5.46)        | 3.67 (6.02)   | 0.29 (4.63)     | -2.72 (4.99)     | 0.030          | 0.192        | 0.025               |
|                 |                 | 3        | 13.91                  | 0.69 (1.76)         | -0.42 (1.90)  | -0.16 (4.61)    | -0.11 (5.34)     | 0.674          | 0.176        | 0.177               |
|                 | Invert/Evert    | 1        | 73.62                  | -2.86 (7.75)        | -5.02 (7.66)  | 3.90 (7.92)     | 3.98 (7.15)      | <0.001         | 0.117        | 0.100               |
|                 |                 | 2        | 20.65                  | 2.12 (3.47)         | 0.97 (3.18)   | -1.43 (4.04)    | -1.67 (5.99)     | <0.001         | 0.014        | 0.100               |
|                 |                 | 3        | 64.56                  | -2.25 (6.78)        | 3.92 (7.02)   | -2.85 (8.60)    | 1.18 (8.09)      | 0.284          | <0.001       | 0.206               |
|                 | Int Rot/Ext Rot | 1        | 14.51                  | 1.34 (4.08)         | -1.48 (3.92)  | -0.79 (3.43)    | 0.93 (3.20)      | 0.845          | 0.126        | 0.011               |
|                 |                 | 2        | 11.04                  | -0.18 (3.33)        | 0.46 (4.61)   | -0.87 (2.85)    | 0.60 (1.87)      | 0.705          | 0.007        | 0.217               |
|                 |                 | 3        | 66.67                  | -0.53 (8.81)        | -1.41 (9.54)  | -0.75 (8.67)    | 2.69 (4.44)      | 0.213          | 0.209        | 0.023               |
|                 | Knee            | Ext/Flex | 1                      | 19.17               | -1.98 (4.42)  | -1.42 (3.96)    | 3.07 (4.44)      | 0.33 (3.26)    | <0.001       | 0.020               |
| 2               |                 |          | 9.81                   | -2.12 (3.04)        | -1.63 (3.07)  | 2.73 (1.32)     | 1.01 (1.97)      | <0.001         | 0.093        | <0.001              |
| 3               |                 |          | 85.74                  | -2.72 (8.00)        | 2.63 (12.66)  | 1.98 (4.49)     | -1.89 (9.25)     | 0.964          | 0.352        | 0.017               |
| Adduct/Abduct   |                 | 1        | 6.67                   | 0.07 (1.64)         | -2.09 (2.87)  | 0.25 (2.50)     | 1.76 (1.59)      | <0.001         | 0.148        | 0.021               |
|                 |                 | 2        | 90.20                  | 4.95 (5.79)         | 2.98 (7.02)   | -2.30 (5.31)    | -5.64 (13.69)    | <0.001         | 0.018        | 0.416               |
| Int Rot/Ext Rot |                 | 1        | 83.65                  | 0.70 (6.10)         | -5.84 (11.02) | 4.89 (5.88)     | 0.24 (9.29)      | 0.007          | <0.001       | 0.327               |
|                 |                 | 2        | 10.23                  | -0.98 (2.27)        | -0.46 (2.63)  | 1.26 (3.04)     | 0.18 (4.22)      | 0.003          | 0.452        | 0.040               |
| Hip             | Adduct/Abduct   | 1        | 86.23                  | 14.10 (3.66)        | 14.76 (4.68)  | 10.37 (1.90)    | 12.00 (1.22)     | <0.001         | 0.001        | 0.092               |
|                 |                 | 2        | 9.29                   | -0.56 (3.25)        | 0.29 (4.56)   | 0.85 (1.70)     | -0.58 (1.55)     | 0.655          | 0.372        | 0.028               |
|                 | Int Rot/Ext Rot | 1        | 75.65                  | 2.85 (8.50)         | 0.32 (9.08)   | -4.22 (6.00)    | 1.05 (9.60)      | 0.035          | 0.095        | 0.001               |
|                 |                 | 2        | 16.76                  | -0.13 (4.20)        | -0.96 (5.16)  | 0.08 (3.57)     | 1.01 (3.14)      | 0.256          | 0.829        | 0.023               |

Note: Dorsi/Plant = dorsiflexion/plantarflexion, Invert/Evert = inversion/eversion, Int Rot/Ext Rot = internal rotation/external rotation, Ext/Flex = extension/flexion, Adduct/Abduct = adduction/abduction, Flex/Ext = flexion/extension. Significant difference ( $p < 0.05$ ). The significant differences in interaction effect were determined using Bonferroni corrections ( $\alpha = 0.008$ ).

**Table S3.** Mean (SD) of joint moments for all principal components (PCs) retained according to the 90% trace criterion.

| Joint | Moment             | PC | Variance<br>Explained<br>(%) | Mean (SD) PC scores |              |                     |                      | Runner<br>p-Value | 5 km<br>p-Value | Interaction<br>p-Value |
|-------|--------------------|----|------------------------------|---------------------|--------------|---------------------|----------------------|-------------------|-----------------|------------------------|
|       |                    |    |                              | Novice/Pre          | Novice/Post  | Experienced/P<br>re | Experienced/<br>Post | Main<br>Effect    | Main<br>Effect  | Effect                 |
| Ankle | Dorsi/Plant        | 1  | 50.03                        | -1.25 (9.46)        | 2.46 (7.90)  | -0.75 (5.82)        | -0.46 (3.34)         | 0.369             | 0.001           | 0.013                  |
|       |                    | 2  | 27.92                        | -1.24 (4.74)        | 1.19 (6.02)  | -2.81 (3.74)        | 2.85 (4.76)          | 0.966             | <0.001          | 0.020                  |
|       |                    | 3  | 10.50                        | 1.04 (2.40)         | 0.09 (2.65)  | -0.29 (3.70)        | -0.84 (3.85)         | 0.017             | <0.001          | 0.576                  |
|       |                    | 4  | 4.96                         | 1.02 (2.23)         | -0.63 (2.13) | 0.54 (2.23)         | -0.93 (1.81)         | 0.334             | 0.051           | 0.632                  |
|       | Invert/Evert       | 1  | 67.39                        | 3.85 (7.53)         | 4.40 (7.42)  | -5.04 (7.05)        | -3.21 (6.63)         | <0.001            | 0.197           | 0.579                  |
|       |                    | 2  | 19.20                        | -1.09 (3.90)        | -0.83 (4.87) | -0.87 (2.96)        | 2.79 (4.53)          | <0.001            | 0.072           | 0.025                  |
|       |                    | 3  | 6.21                         | 0.20 (3.79)         | 0.08 (2.27)  | 0.03 (1.38)         | -0.32 (2.00)         | 0.481             | 0.483           | 0.717                  |
|       |                    | 4  | 5.54                         | -0.36 (1.86)        | 0.01 (2.33)  | 0.10 (1.89)         | 0.25 (3.18)          | 0.254             | 0.313           | 0.671                  |
|       | Int Rot/Ext<br>Rot | 1  | 62.80                        | 2.14 (7.29)         | 1.10 (8.74)  | -3.48 (7.58)        | 0.24 (6.66)          | 0.007             | 0.062           | 0.001                  |
|       |                    | 2  | 15.69                        | 0.56 (3.53)         | 0.53 (2.87)  | -1.41 (3.96)        | 0.31 (4.13)          | 0.143             | 0.067           | 0.011                  |
|       |                    | 3  | 9.59                         | 0.57 (3.62)         | 0.71 (2.41)  | -1.73 (2.82)        | 0.44 (2.76)          | 0.007             | 0.001           | 0.016                  |
|       |                    | 4  | 5.54                         | -0.36 (1.86)        | 0.01 (2.33)  | 0.10 (1.89)         | 0.25 (3.18)          | 0.254             | 0.313           | 0.671                  |
| Knee  | Ext/Flex           | 1  | 37.17                        | -1.72 (4.67)        | -0.98 (5.05) | 2.59 (7.33)         | 0.11 (6.38)          | 0.053             | 0.091           | 0.062                  |
|       |                    | 2  | 26.09                        | 1.42 (5.23)         | 2.04 (3.86)  | -3.39 (5.19)        | -0.07 (4.46)         | 0.001             | <0.001          | 0.013                  |
|       |                    | 3  | 19.17                        | 1.30 (3.86)         | 2.20 (2.01)  | -2.53 (5.13)        | -0.97 (4.39)         | <0.001            | 0.004           | 0.345                  |
|       |                    | 4  | 7.62                         | 0.60 (2.16)         | -1.63 (2.79) | 0.44 (2.99)         | 0.59 (2.50)          | 0.058             | 0.072           | 0.031                  |
|       | Adduct/Abd<br>uct  | 1  | 49.62                        | -0.67 (7.60)        | -0.36 (6.36) | -4.08 (5.36)        | 5.11 (5.72)          | 0.459             | <0.001          | <0.001                 |
|       |                    | 2  | 18.60                        | 1.92 (3.32)         | 2.49 (4.00)  | -3.16 (3.81)        | -1.25 (3.60)         | <0.001            | <0.001          | 0.112                  |
|       |                    | 3  | 10.16                        | 0.34 (1.99)         | -0.18 (2.52) | -0.81 (3.88)        | 0.65 (3.89)          | 0.768             | 0.174           | 0.011                  |
|       |                    | 4  | 8.14                         | -1.11 (2.61)        | -0.29 (1.69) | 0.16 (1.95)         | 1.24 (2.97)          | 0.001             | <0.001          | 0.652                  |
|       | Int Rot/Ext<br>Rot | 5  | 5.52                         | -0.33 (2.28)        | 0.15 (1.68)  | -0.19 (2.01)        | 0.37 (2.32)          | 0.646             | 0.064           | 0.861                  |
|       |                    | 1  | 48.08                        | -0.98 (2.93)        | -3.78 (4.97) | 5.29 (7.05)         | -0.53 (5.83)         | <0.001            | <0.001          | 0.023                  |
|       |                    | 2  | 18.42                        | -1.88 (4.30)        | -1.67 (4.51) | 3.08 (3.69)         | 0.47 (2.63)          | <0.001            | 0.053           | 0.015                  |
|       |                    | 3  | 13.18                        | 1.01 (2.10)         | 1.69 (2.96)  | -0.78 (4.03)        | -1.92 (2.85)         | <0.001            | 0.387           | 0.009                  |
|       |                    | 4  | 11.54                        | 0.84 (2.47)         | 0.55 (3.44)  | 0.27 (2.60)         | -1.66 (3.25)         | 0.067             | 0.050           | 0.013                  |

|     |                 |   |       |              |              |              |              |        |        |        |
|-----|-----------------|---|-------|--------------|--------------|--------------|--------------|--------|--------|--------|
| Hip | Flex/Ext        | 1 | 51.64 | 4.60 (4.86)  | 3.17 (6.92)  | -5.11 (6.07) | -2.66 (5.07) | <0.001 | 0.457  | <0.001 |
|     |                 | 2 | 19.41 | -1.44 (5.40) | -0.07 (3.22) | 0.89 (3.34)  | 0.62 (3.67)  | 0.058  | 0.279  | 0.050  |
|     |                 | 3 | 11.79 | 0.48 (2.28)  | -0.63 (2.62) | 0.40 (2.80)  | -0.25 (3.35) | 0.764  | 0.050  | 0.546  |
|     |                 | 4 | 6.33  | -0.51 (1.83) | -0.17 (2.50) | 0.27 (2.10)  | 0.41 (3.39)  | 0.082  | 0.439  | 0.639  |
|     | Adduct/Abduct   | 1 | 45.07 | -0.66 (5.94) | -0.27 (8.47) | -1.35 (3.40) | 2.27 (4.56)  | 0.393  | 0.051  | 0.024  |
|     |                 | 2 | 22.64 | 1.24 (4.06)  | 1.24 (4.16)  | -3.79 (4.87) | 1.31 (1.89)  | 0.003  | <0.001 | 0.031  |
|     |                 | 3 | 15.04 | 0.19 (1.93)  | 0.97 (3.29)  | -0.28 (4.29) | -0.89 (5.19) | 0.055  | 0.775  | 0.010  |
|     |                 | 4 | 8.14  | 1.94 (2.62)  | 0.93 (2.61)  | -1.39 (2.07) | -1.48 (2.56) | <0.001 | 0.059  | 0.150  |
|     | Int Rot/Ext Rot | 1 | 53.41 | 0.95 (8.29)  | 1.52 (7.21)  | -3.48 (6.36) | 1.00 (5.41)  | 0.056  | 0.085  | 0.009  |
|     |                 | 2 | 23.35 | -1.72 (3.28) | -1.50 (3.25) | 0.77 (4.21)  | 2.45 (5.33)  | <0.001 | 0.057  | 0.028  |
|     |                 | 3 | 7.92  | -0.79 (2.17) | -0.42 (2.72) | 0.74 (1.78)  | 0.46 (3.96)  | 0.051  | 0.898  | 0.229  |
|     |                 | 4 | 6.50  | -0.81 (1.61) | -0.47 (3.64) | 0.24 (2.02)  | 1.04 (2.18)  | 0.012  | 0.081  | 0.379  |

Note: Dorsi/Plant = dorsiflexion/plantarflexion, Invert/Evert = inversion/eversion, Int Rot/Ext Rot = internal rotation/external rotation, Ext/Flex = extension/flexion, Adduct/Abduct = adduction/abduction, Flex/Ext = flexion/extension. Significant difference ( $p < 0.05$ ). The significant differences in interaction effect were determined using Bonferroni corrections ( $\alpha = 0.008$ ).

**Table S4.** Mean (SD) of ground reaction forces (GRFs) for all principal components (PCs) retained according to the 90% trace criterion.

| GRF                | PC | Variance Explained (%) | Mean (SD) PC scores |              |                 |                  | Runner p-Value | 5 km p-Value | Interaction p-Value |
|--------------------|----|------------------------|---------------------|--------------|-----------------|------------------|----------------|--------------|---------------------|
|                    |    |                        | Novice/Pre          | Novice/Post  | Experienced/Pre | Experienced/Post | Main Effect    | Main Effect  | Effect              |
| Vertical           | 1  | 39.39                  | -0.15 (4.82)        | -2.63 (7.45) | 3.24 (5.87)     | -0.47 (5.74)     | 0.007          | <0.001       | 0.265               |
|                    | 2  | 26.25                  | -0.02 (3.97)        | 0.78 (4.04)  | -2.79 (5.74)    | 2.03 (5.48)      | 0.499          | 0.082        | 0.025               |
|                    | 3  | 13.57                  | 0.70 (3.29)         | 1.11 (2.64)  | -0.68 (4.37)    | -1.13 (3.91)     | 0.001          | 0.966        | 0.368               |
|                    | 4  | 7.85                   | -0.62 (2.54)        | -1.87 (2.90) | 1.31 (2.30)     | 1.17 (2.23)      | 0.053          | 0.026        | 0.096               |
|                    | 5  | 5.27                   | -0.16 (2.67)        | 0.41 (2.05)  | -0.26 (1.98)    | -0.01 (5.99)     | 0.470          | 0.156        | 0.600               |
| Anterior-posterior | 1  | 47.61                  | 3.32 (6.04)         | 1.64 (5.94)  | -3.71 (7.41)    | -1.25 (6.27)     | <0.001         | 0.728        | 0.015               |
|                    | 2  | 19.77                  | -2.25 (2.77)        | -0.11 (4.11) | -0.20 (3.37)    | 2.55 (4.50)      | <0.001         | <0.001       | 0.544               |
|                    | 3  | 15.89                  | -0.26 (3.75)        | 0.66 (3.89)  | 0.44 (4.16)     | -0.84 (4.17)     | 0.653          | 0.694        | 0.028               |
|                    | 4  | 8.33                   | -0.33 (3.14)        | -0.95 (3.66) | 1.09 (2.17)     | 0.19 (1.99)      | 0.058          | 0.090        | 0.645               |
| Medial-lateral     | 1  | 66.12                  | 1.15 (9.65)         | 2.01 (9.71)  | -1.46 (6.52)    | -1.71 (5.57)     | 0.053          | 0.663        | 0.353               |
|                    | 2  | 13.23                  | -1.51 (3.30)        | -1.13 (3.49) | 1.05 (2.20)     | 1.59 (2.62)      | <0.001         | 0.089        | 0.759               |
|                    | 3  | 7.29                   | 0.36 (1.83)         | 0.49 (2.07)  | -0.23 (2.90)    | -0.62 (3.62)     | 0.117          | 0.583        | 0.335               |
|                    | 4  | 4.68                   | -0.27 (1.79)        | -0.59 (2.67) | 0.62 (2.20)     | 0.25 (1.78)      | 0.050          | 0.141        | 0.935               |

Note: The significant differences in interaction effect were determined using Bonferroni corrections ( $\alpha = 0.008$ ).
